# Supplementary material for: In Silico and Ex Vivo Studies on the Spasmolytic Activities of Fenchone Using Isolated Guinea Pig Trachea
Source: MDPI journal article supplement (doi:10.3390/molecules27041360), 2022-02-17
Supplement: s1 [file s1]

**Table S1.** Vina Grid Search Space and box size of the receptors

| Receptors | Vina Grid Search Space                                                                                                                                         |
|-----------|----------------------------------------------------------------------------------------------------------------------------------------------------------------|
| 6JPA      | center_x = 167.1143<br>center_y = 181.1604<br>center_z = 166.9501<br>size_x = 95.1036225891<br>size_y = 94.9972616577<br>size_z = 111.369475861                |
| 5LAQ      | center_x = 2.13904252922<br>center_y = -40.8483539295<br>center_z = 3.81835521104<br>size_x = 39.6957028549<br>size_y = 33.1738787585<br>size_z = 31.192305625 |
| 4NPW      | center_x = 22.0659489085<br>center_y = 27.8833197572<br>center_z = 47.3617937781<br>size_x = 27.6928237995<br>size_y = 23.6983115239<br>size_z = 24.1251809306 |
| 3ITU      | center_x = 19.1413<br>center_y = 2.498<br>center_z = 38.682<br>size_x = 25<br>size_y = 25<br>size_z = 25                                                       |
| 6EBM      | center_x = 159.459569318<br>center_y = 162.184255506<br>center_z = 141.663830927<br>size_x = 44.0436834492<br>size_y = 28.7509110129<br>size_z = 47.7217175449 |
| 7VNP      | center_x = 123.0037<br>center_y = 123.0189<br>center_z = 128.8314<br>size_x = 117.532685623<br>size_y = 115.65650032<br>size_z = 100.403661346                 |

**Table S2.** Redocked structures overlayed on the co-crystallized ligands

| Receptors | Co-crystallized ligand | Redocked co-crystallized ligand                                                      | RMSD   |
|-----------|------------------------|--------------------------------------------------------------------------------------|--------|
| 6JPA      | Verapamil              | 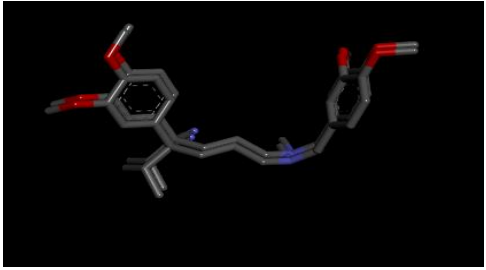   | 0.8246 |
| 5LAq      | NPD                    |    | 1.6217 |
| 4npw_     | 0NY                    |   | 0.5012 |
| 3ITU      | IBMX                   |  | 0.5801 |

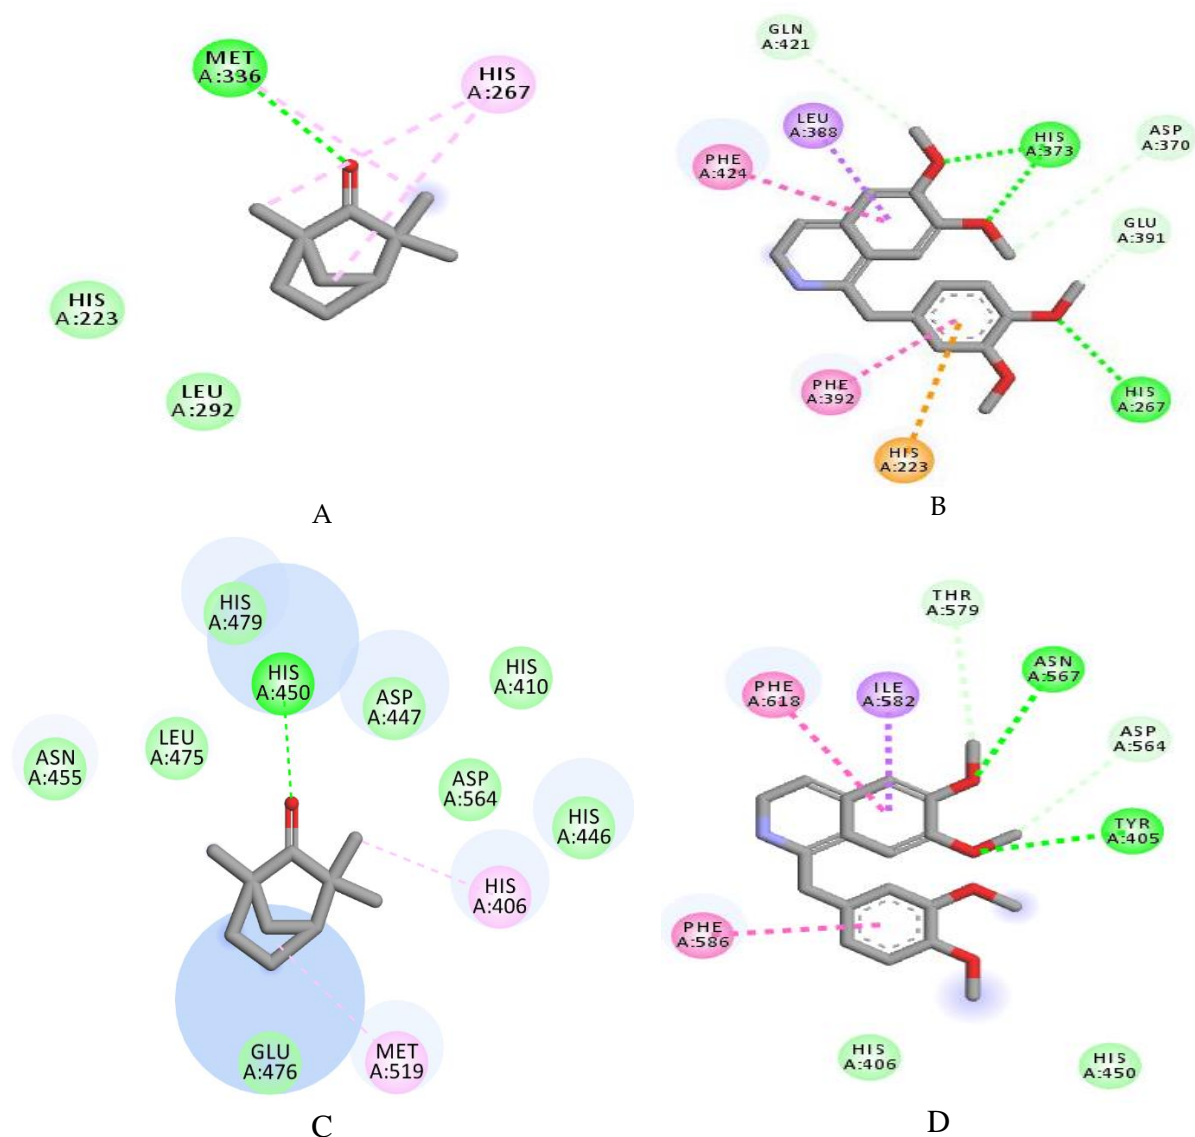

**Figure S1.** A to D show the ligand receptor interactions. Figure A-B and C-D show the binding mode of FNC and PPV with 4NPW and 5LAQ respectively. Dark green circles and lines show hydrogen bonds while the light green spheres are showing Vander Waal interaction between ligand and residues.
